# Supplementary material for: An advanced color tunable persistent luminescent NaCa2GeO4F:Tb3+phosphor for multicolor anti-counterfeiting
Source: Royal Society of Chemistry journal article supplement (doi:10.1039/d0dt04231e), 2021-01-01
Supplement: d0dt04231e1.pdf [file d0dt04231e1.pdf]

# Support information

## An advanced color tunable persistent luminescent

### NaCa<sub>2</sub>GeO<sub>4</sub>F:Tb<sup>3+</sup> phosphor for multicolor anti-counterfeiting

Pengxiang pei<sup>a</sup>, Pengbo DuanMu<sup>b</sup>, Binbin Wang<sup>a</sup>, Xuan Miao<sup>a</sup>, Cheng Zhang<sup>a</sup> and Weisheng Liu<sup>a\*</sup>

<sup>a</sup>State Key Laboratory of Solid Lubrication, Lanzhou Institute of Chemical Physics, Chinese Academy of Sciences, Lanzhou 730000, Lanzhou, China. E-mail: [liuws@lzu.edu.cn](mailto:liuws@lzu.edu.cn); Tel: +86 (0) 931-8915151.

<sup>b</sup>School of Civil Engineering and Architecture, Zhongyuan University of Technology, Zhengzhou 450007, China.

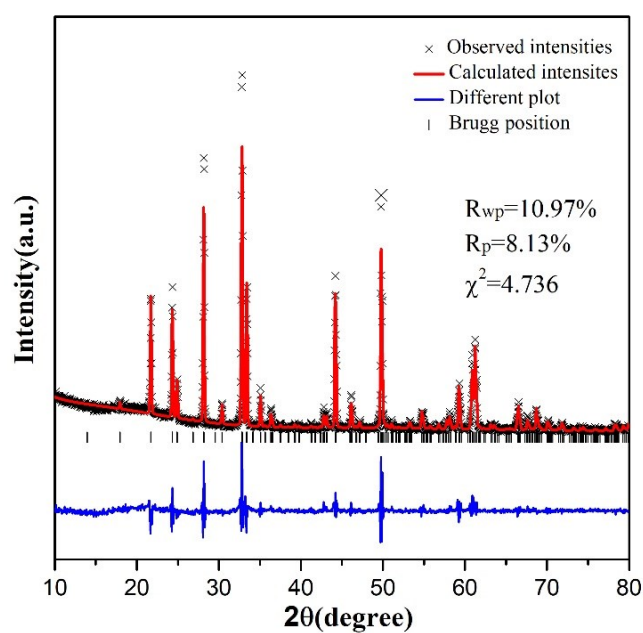

**Fig. S1** the Rietveld XRD refinement of NCGOF: 0.1%Tb<sup>3+</sup> phosphor

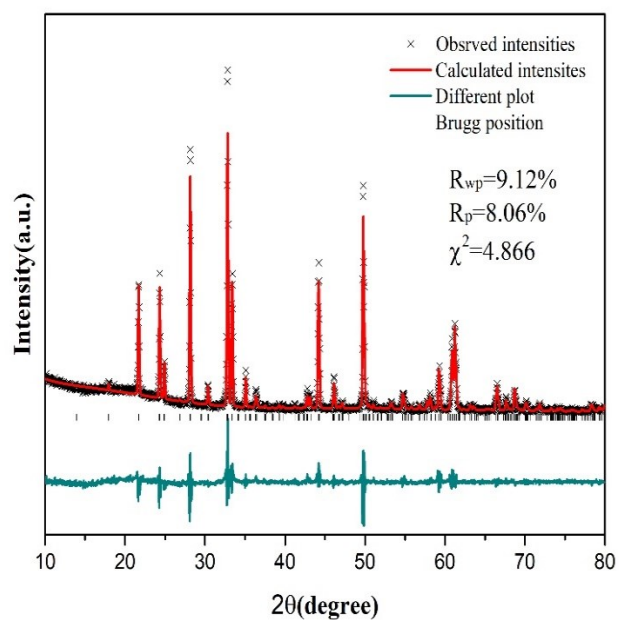

**Fig. S2** the Rietveld XRD refinement of NCGOF: 0.4%Tb<sup>3+</sup> phosphor

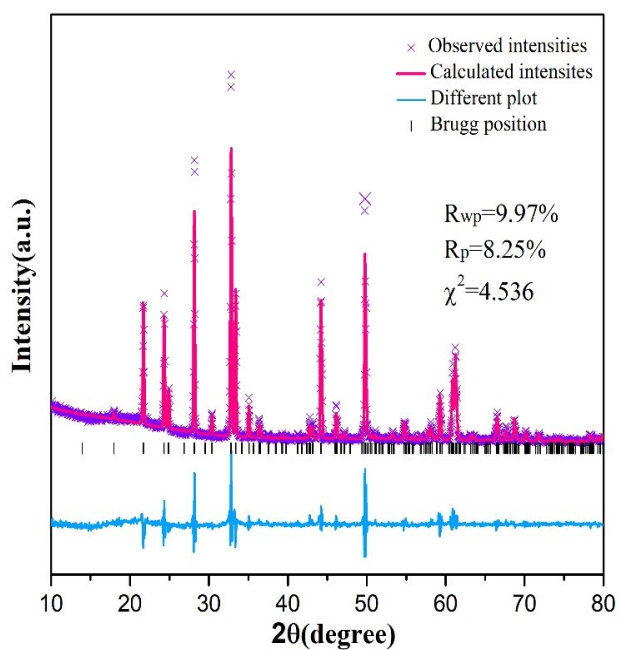

**Fig. S3** the Rietveld XRD refinement of NCGOF: 0.8%Tb<sup>3+</sup> phosphor

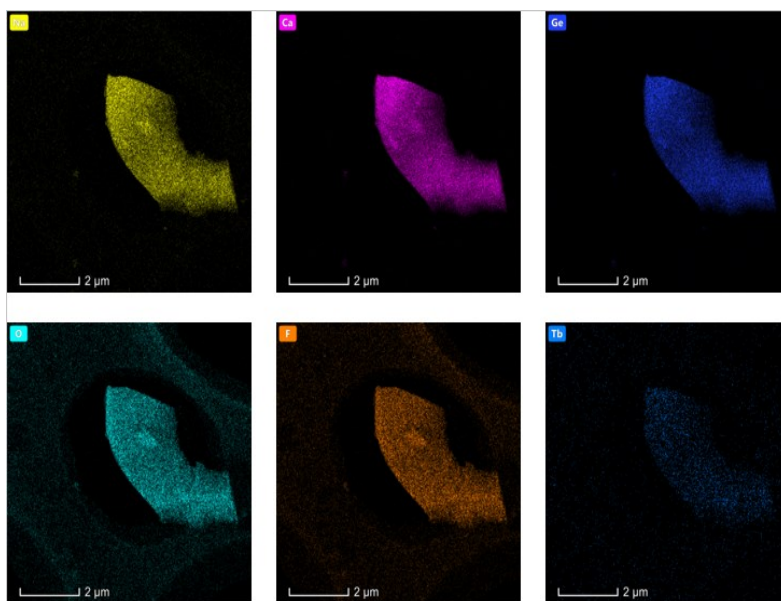

**Fig. S4.** Element distribution of  $\text{NaCa}_2\text{GeO}_4\text{F}: 0.4\% \text{Tb}^{3+}$  material.

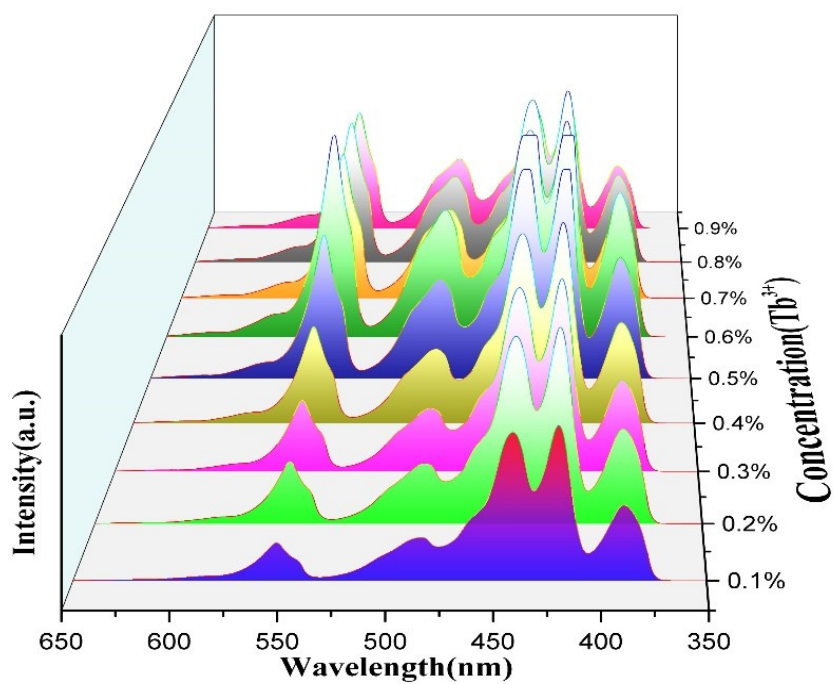

**Fig. S5** the PL spectra of the  $\text{NCGOF}: x\text{Tb}^{3+}$  phosphors ( $x=0.1\% - 0.8\%$ ).

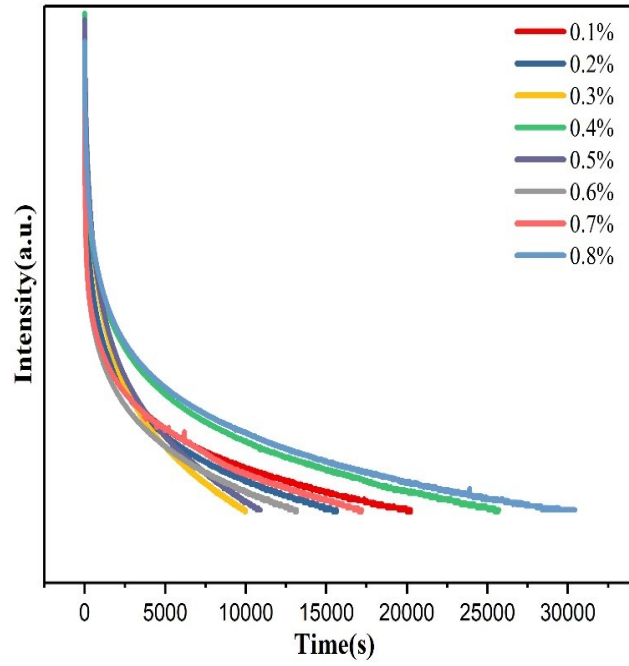

**Fig. S6** the PersL decay curves of NCGOF: xTb<sup>3+</sup> phosphors (x=0.1% - 0.8%)

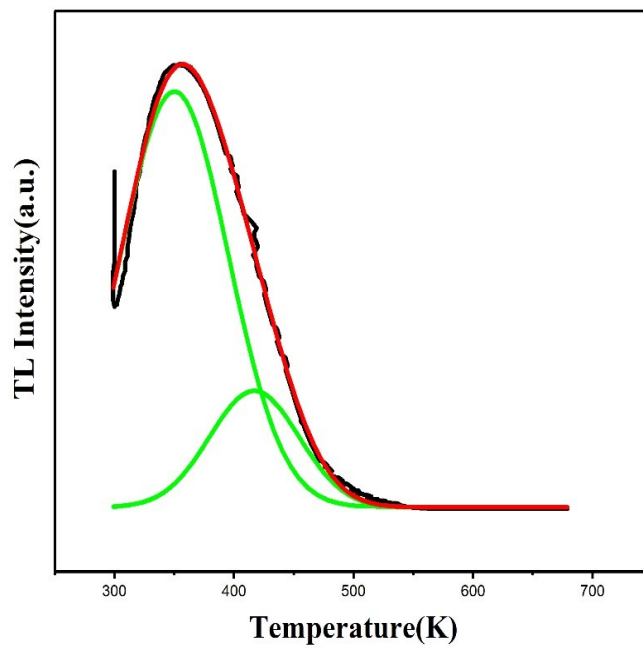

**Fig. S7** TL glow curve of the NCGOF: 0.1%Tb<sup>3+</sup> phosphor

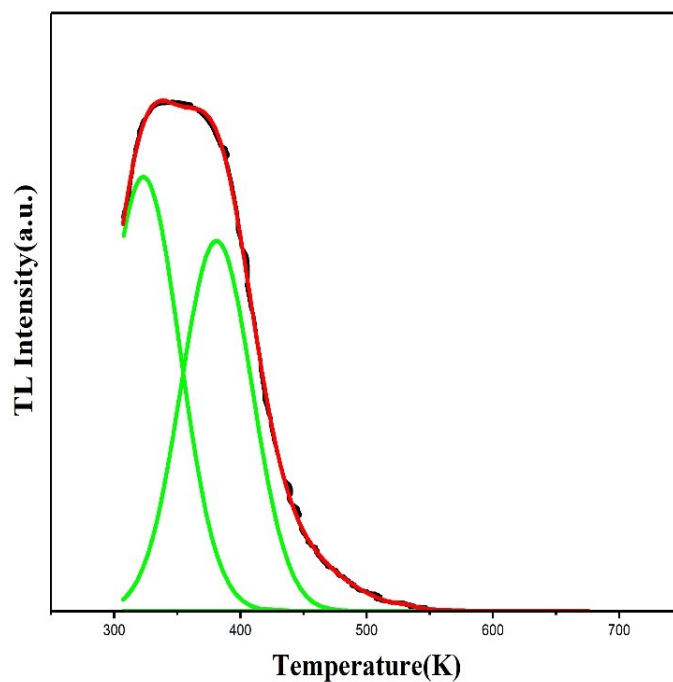

**Fig. S8** TL glow curve of the NCGOF: 0.8%Tb<sup>3+</sup> phosphor

| Formula                      | Host         |       |       | 0.1%Tb <sup>3+</sup> |       |       | 0.4%Tb <sup>3+</sup> |       |       | 0.8%Tb <sup>3+</sup> |       |       |
|------------------------------|--------------|-------|-------|----------------------|-------|-------|----------------------|-------|-------|----------------------|-------|-------|
| Crystal system               | Pnma (no.62) |       |       | Pnma (no.62)         |       |       | Pnma (no.62)         |       |       | Pnma (no.62)         |       |       |
| Lattice parameters           | a            | b     | c     | a                    | b     | c     | a                    | b     | c     | a                    | b     | c     |
|                              |              | 5.365 | 7.326 | 12.662               | 5.371 | 7.321 | 12.689               | 5.364 | 7.327 | 12.691               | 5.368 | 7.317 |
| Cell volume(Å <sup>3</sup> ) | 497.735      |       |       | 498.456              |       |       | 498.684              |       |       | 498.765              |       |       |
| Density(gm/cm <sup>3</sup> ) | 3.483        |       |       | 3.476                |       |       | 3.483                |       |       | 3.482                |       |       |

**Table S1** Rietveld refinement data of NCGOF: xTb<sup>3+</sup> (x=0.1%,0.4%, 0.8%) samples

|             | <b>CIE X</b> | <b>CIE Y</b> | <b>Peak</b> | <b>CCT</b> |
|-------------|--------------|--------------|-------------|------------|
| <b>0.1%</b> | 0.1763       | 0.1143       | 420         | 3177       |
| <b>0.2%</b> | 0.1814       | 0.1334       | 420         | 4159       |
| <b>0.3%</b> | 0.1851       | 0.1473       | 420         | 4255       |
| <b>0.4%</b> | 0.1932       | 0.1753       | 420         | 4452       |
| <b>0.5%</b> | 0.2003       | 0.2005       | 420         | 6212       |
| <b>0.6%</b> | 0.2034       | 0.2103       | 420         | 4809       |
| <b>0.7%</b> | 0.2116       | 0.2396       | 420         | 4607       |
| <b>0.8%</b> | 0.2196       | 0.2624       | 554         | 7709       |

**Table S2** the CIE chromaticity coordinate as well as the correlate color temperature (CCT) values of the  $\text{NaCa}_2\text{GeO}_4\text{F}:x\text{Tb}^{3+}$  ( $x=0.1\%-0.8\%$ ).

| Formula              | $\text{NaCa}_2\text{GeO}_4\text{F}:x\% \text{Tb}^{3+}$ |       |              | $\text{Sr}_2\text{Ga}_2\text{GeO}_7: x\% \text{Pr}^{3+}$ |         |      |
|----------------------|--------------------------------------------------------|-------|--------------|----------------------------------------------------------|---------|------|
| x%                   | 1%                                                     | 4%    | 8%           | 0.2%                                                     | 1%      | 3%   |
| Color (PersL)        | blue                                                   | cyan  | Bright green | red                                                      | pink    | blue |
| afterglow            | 5.62h                                                  | 8.52h | 7.14h        | 23min                                                    | < 15min | 2min |
| Synthesis conditions | 850°C 8h                                               |       |              | 1300°C 6h                                                |         |      |

**Table S3** the performance comparison between  $\text{NaCa}_2\text{GeO}_4\text{F}:x\% \text{Tb}^{3+}$  and  $\text{Sr}_2\text{Ga}_2\text{GeO}_7: x\% \text{Pr}^{3+}$ .
